# Supplementary material for: Association of BRAFV600E Mutation with the Aggressive Behavior of Papillary Thyroid Microcarcinoma: A Meta-Analysis of 33 Studies
Source: MDPI journal article supplement (doi:10.3390/ijms232415626), 2022-12-09
Supplement: s1 [file s1]

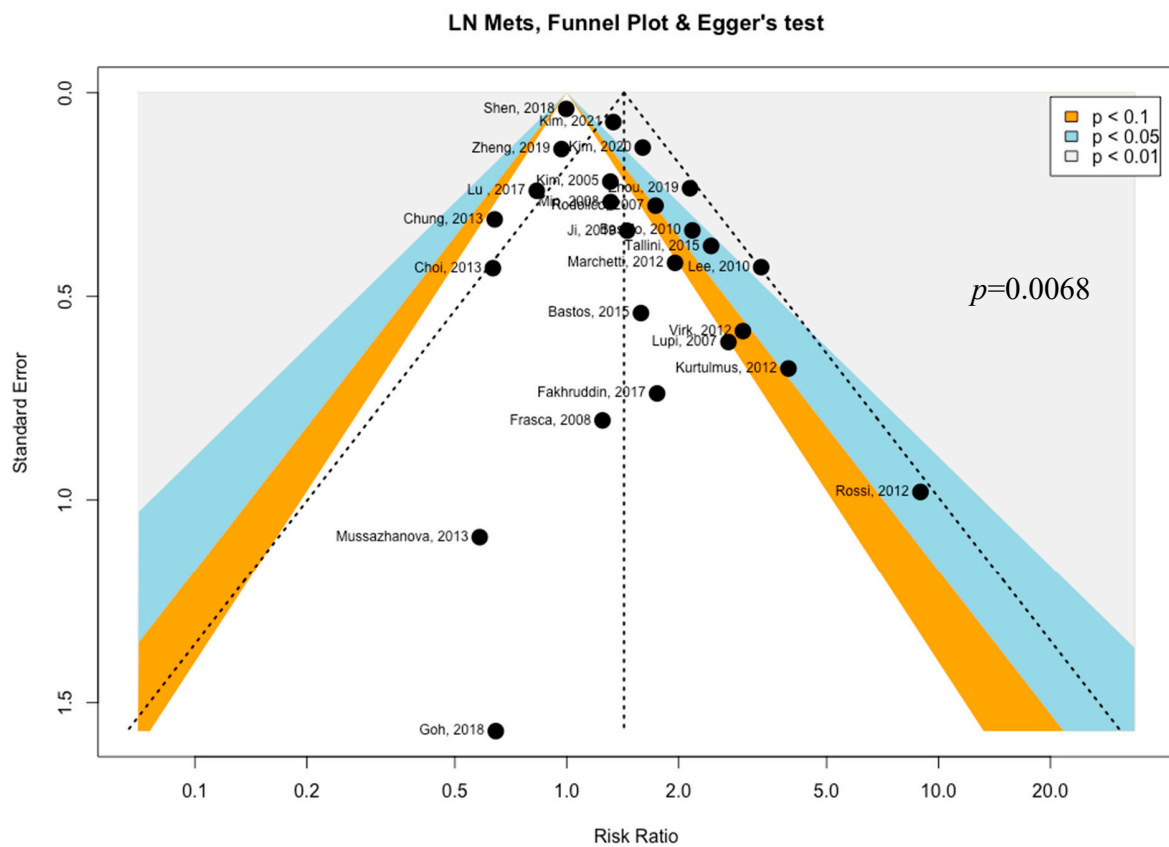

**Supplemental Figure S1.** Funnel plot for publication bias. Egger's test was performed.

**Supplementary Table S1. Pooled analysis for pathological and clinical parameters.**

| Characteristics   | Number studies | Sample size |                   |                   | Model | Effect size |            |         | Heterogeneity  |         |                  | Publication bias |
|-------------------|----------------|-------------|-------------------|-------------------|-------|-------------|------------|---------|----------------|---------|------------------|------------------|
|                   |                | Total       | BRAF <sub>+</sub> | BRAF <sub>-</sub> |       | OR          | 95% CI     | p-value | I <sup>2</sup> | p-value | Tau <sup>2</sup> | P (Egger's test) |
| Pathological data |                |             |                   |                   |       |             |            |         |                |         |                  |                  |
| Multifocal        | 18             | 4,048       | 2,200             | 1,848             | F     | 1.31        | 1.13, 1.51 | <0.001  | 21%            | 0.20    | 0.027            | 0.60             |
| Tumor size (>5mm) | 9              | 1,036       | 642               | 394               | F     | 1.69        | 1.88, 2.41 | 0.004   | 0.0%           | 0.89    | 0.16             | 0.34             |
| Capsular invasion | 4              | 634         | 416               | 218               | F     | 2.15        | 1.49, 3.09 | <0.001  | 0.0%           | 0.56    | 0.0              | 0.11             |
| ETE               | 20             | 3,772       | 1,962             | 1,810             | R     | 2.38        | 1.71, 3.30 | <0.001  | 61.7%          | <0.001  | 0.27             | 0.90             |
| Overall LNM       | 26             | 4,867       | 2,567             | 2,300             | R     | 1.58        | 1.02, 2.42 | 0.037   | 52.3%          | 0.001   | 0.84             | 0.47             |
| Central LNM       | 10             | 1,943       | 1,313             | 630               | R     | 1.62        | 1.03, 2.52 | 0.034   | 48.4%          | 0.042   | 0.87             | 0.27             |
| Lateral LNM       | 9              | 1,761       | 1,226             | 535               | R     | 1.97        | 0.96, 4.02 | 0.06    | 53.5%          | 0.028   | 0.55             | 0.28             |
| Clinical data     |                |             |                   |                   |       |             |            |         |                |         |                  |                  |
| Advanced stage    | 10             | 1,607       | 926               | 681               | R     | 1.60        | 1.22, 2.11 | 0.001   | 59.8%          | 0.008   | 0.32             | 0.08             |
| Recurrence        | 4              | 534         | 219               | 315               | F     | 2.49        | 1.69, 3.68 | <0.001  | 5.9%           | 0.36    | 0.01             | 0.54             |

Pooled analysis was calculated using Mantel-Haenszel and measured as odds ratio (OR) and 95% confidence interval (CI). R: Random-effects model, F: Fixed-effects model, ETE: extrathyroid extension, LNM: lymph node metastasis (LNM). I<sup>2</sup>: the ratio of true heterogeneity to total observed variation.
